# Supplementary material
Source: Royal Society of Chemistry journal article supplement (doi:10.1039/d6tb00360e)
Supplement: d6tb00360e1.pdf [file d6tb00360e1.pdf]

## Easy Access to 2,1,3-Benzothiadiazole-based Symmetric Deep Red-AIEgens for Concurrent Staining of Lipid Droplets and Lysosomes

Shivani Tripathi,<sup>a</sup> Harshala Ramesh Patil,<sup>b</sup> V Vamsi Krishna Venuganti<sup>b</sup> and Manab Chakravarty<sup>\*a</sup>

<sup>a</sup>Department of Chemistry, Birla Institute of Technology and Sciences-Pilani, Hyderabad Campus, Jawaharnagar, Medak, Shamirpet, Hyderabad-500078.

<sup>b</sup>Department of Pharmacy, Birla Institute of Technology and Sciences-Pilani, Hyderabad Campus, Jawaharnagar, Medak, Shamirpet, Hyderabad-500078.

### Contents

|                                                                                                      |        |
|------------------------------------------------------------------------------------------------------|--------|
| 1. Materials and Methods-----                                                                        | S1     |
| 2. PXRD patterns/TGA profile of <b>MBM</b> , <b>DBD</b> and <b>TBT</b> -----                         | S2     |
| 3. Solvatochromism of <b>MBM</b> , <b>DBD</b> and <b>TBT</b> -----                                   | S2-S3  |
| 4. AIE/VIE and Lifetime study of <b>MBM</b> , <b>DBD</b> and <b>TBT</b> -----                        | S3-S5  |
| 5. pH dependent study of <b>MBM</b> , <b>DBD</b> and <b>TBT</b> -----                                | S5     |
| 6. Solid state photophysical of <b>MBM</b> , <b>DBD</b> and <b>TBT</b> -----                         | S6     |
| 7. Cytotoxicity and colocalization study of the designed probes in (a) A549 cells, and (b) NRK cells | S6     |
| 8. Oleic acid treatment for (a) <b>MBM</b> (b) <b>DBD</b> and (c) <b>TBT</b> -----                   | S7     |
| 9. Cellular localisation of <b>MBM</b> in A549 cells                                                 | S7     |
| 10. Photostability of <b>MBM</b> -----                                                               | S8     |
| 11. Synthesis and Characterisation -----                                                             | S8-S12 |

### Materials and Methods

#### General Experimental Information

All the required chemicals were purchased from various companies and used without purification. All the products were characterized by <sup>1</sup>H, and <sup>13</sup>C NMR spectroscopy. NMR spectra were recorded on a Bruker 400 MHz instrument (400 MHz for <sup>1</sup>H NMR, and 101 MHz for <sup>13</sup>C NMR). <sup>1</sup>H NMR experiments are reported in units, parts per million (ppm), and were measured relative to residual DMSO (2.50 ppm) in the deuterated solvent. <sup>13</sup>C NMR spectra are reported in ppm relative to deuterated DMSO (39.52 ppm) and all were obtained with <sup>1</sup>H decoupling. Coupling constants were reported in Hz. Reactions were monitored by thin-layer chromatography (TLC). liquid chromatography-mass spectrometry (LC-MS) was obtained by

the electron spray ionization (ESI) technique using the Q-TOF mass analyser and was reported as  $m/z$  (relative intensity). Melting points of compounds were recorded on a KRUSS Optronic M3000 apparatus.

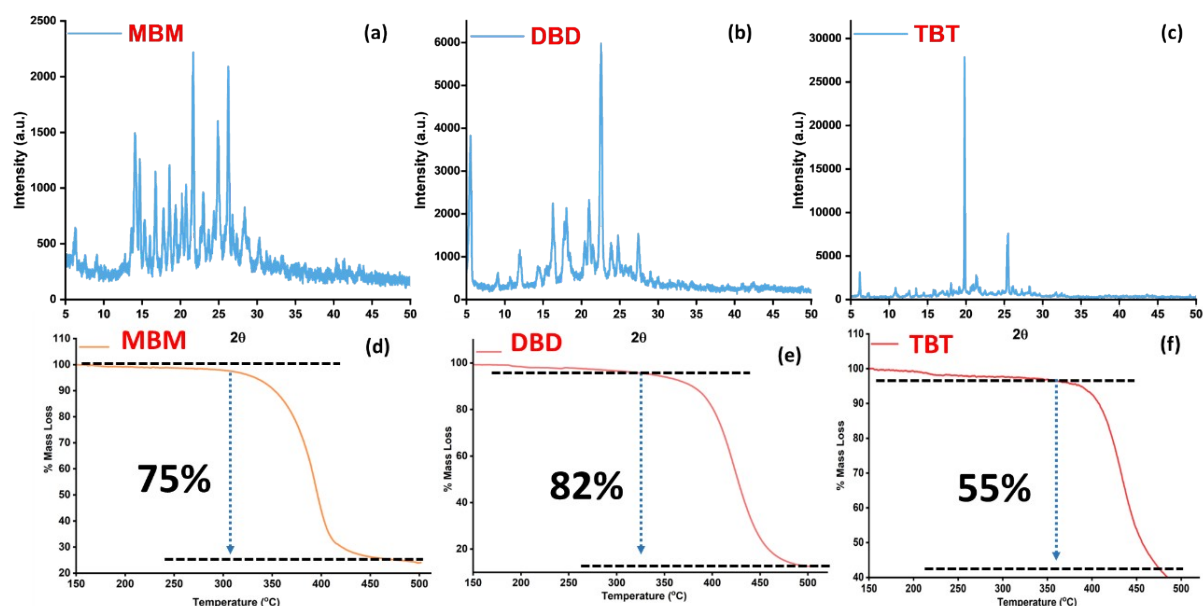

**Fig S1.** PXRD patterns of (a) MBM (b) DBD and (c) TBT, TGA profile of (d) MBM (e) DBD and (f) TBT

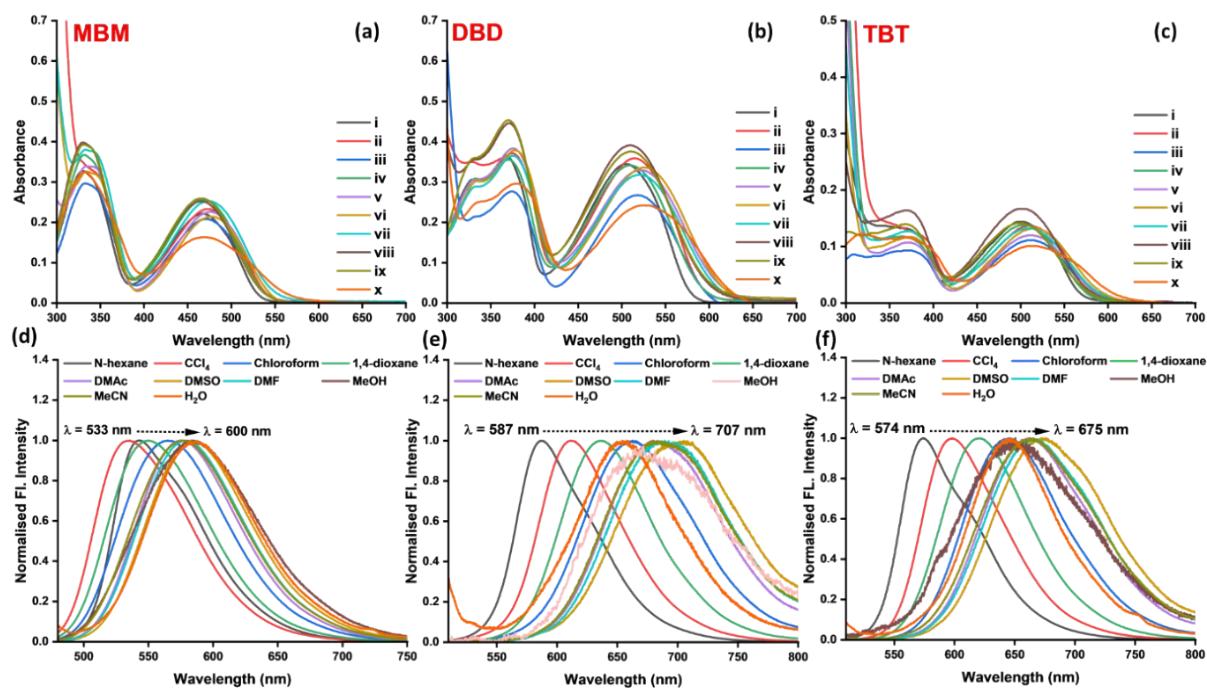

**Fig S2.** UV-Vis spectrum of (a) MBM (b) DBD and (c) TBT in different solvents. i- N-hexane, ii- CCl<sub>4</sub>, iii- chloroform, iv- I,4-dioxane, v- DMAc, vi-DMSO, vii-DMF, viii-MeOH, ix-MeCN, x- H<sub>2</sub>O ,Fl. spectrum of (d) MBM, (e) DBD, and (f) TBT in different solvents.

**Table S1.** Tabulated photophysical parameters of **MBM**, **DBD** and **TBT** in different solvents (10 uM)

| Solvents         | MBM                    |                        |          | DBD                    |                        |          | TBT                    |                        |              |
|------------------|------------------------|------------------------|----------|------------------------|------------------------|----------|------------------------|------------------------|--------------|
|                  | $\lambda_{\text{abs}}$ | $\lambda_{\text{emi}}$ | $\Phi_f$ | $\lambda_{\text{abs}}$ | $\lambda_{\text{emi}}$ | $\Phi_f$ | $\lambda_{\text{abs}}$ | $\lambda_{\text{emi}}$ | $\Phi_f(\%)$ |
| <i>n</i> -hexane | 467                    | 533                    | 24.08    | 500                    | 587                    | 15.91    | 500                    | 574                    | 16.19        |
| CCl <sub>4</sub> | 473                    | 565                    | 36.04    | 500                    | 611                    | 24.99    | 500                    | 597                    | 34.23        |
| Chloroform       | 471                    | 595                    | 20.04    | 520                    | 663                    | 2.58     | 513                    | 645                    | 7.37         |
| 1,4-dioxane      | 464                    | 580                    | 29.09    | 526                    | 636                    | 13.42    | 513                    | 620                    | 15.48        |
| DMAc             | 478                    | 606                    | 24.83    | 526                    | 679                    | 2.43     | 513                    | 660                    | 4.95         |
| DMSO             | 478                    | 614                    | 19.69    | 526                    | 705                    | 0.97     | 497                    | 676                    | 2.75         |
| DMF              | 471                    | 607                    | 20.22    | 521                    | 689                    | 1.34     | 497                    | 665                    | 3.39         |
| MeOH             | 478                    | 615                    | 1.11     | 505                    | 660                    | 0.07     | 497                    | 665                    | 0.13         |
| MeCN             | 465                    | 606                    | 15.80    | 508                    | 685                    | 1.01     | 499                    | 663                    | 2.49         |
| H <sub>2</sub> O | 468                    | 612                    | 2.32     | 526                    | 654                    | 0.65     | 497                    | 675                    | 1.35         |

The relative quantum yield of the probe was measured with respect to Nile Red (in Ethanol) using formula,

$$\Phi_f = \Phi_{ref} \times \frac{a_{ref}}{a_{sam}} \times \frac{A_{sam}}{A_{ref}} \times \left(\frac{n_{sam}}{n_{ref}}\right)^2$$

Where,  $\Phi_f$  = quantum yield of probe  $\Phi_{ref}$  = quantum yield of quinine sulfate (0.12)

$A_{ref}$  = area under curve of emission spectra of Nile Red in Ethanol,  $A_{sam}$  = area under curve of emission spectra of probe,  $a_{sam}$  = Absorbance of probe,  $a_{ref}$  = Absorbance of quinine sulfate in 0.1M H<sub>2</sub>SO<sub>4</sub>,  $n_{sam}$  = refractive index of respective solvents,  $n_{ref}$  = refractive index of ethanol.

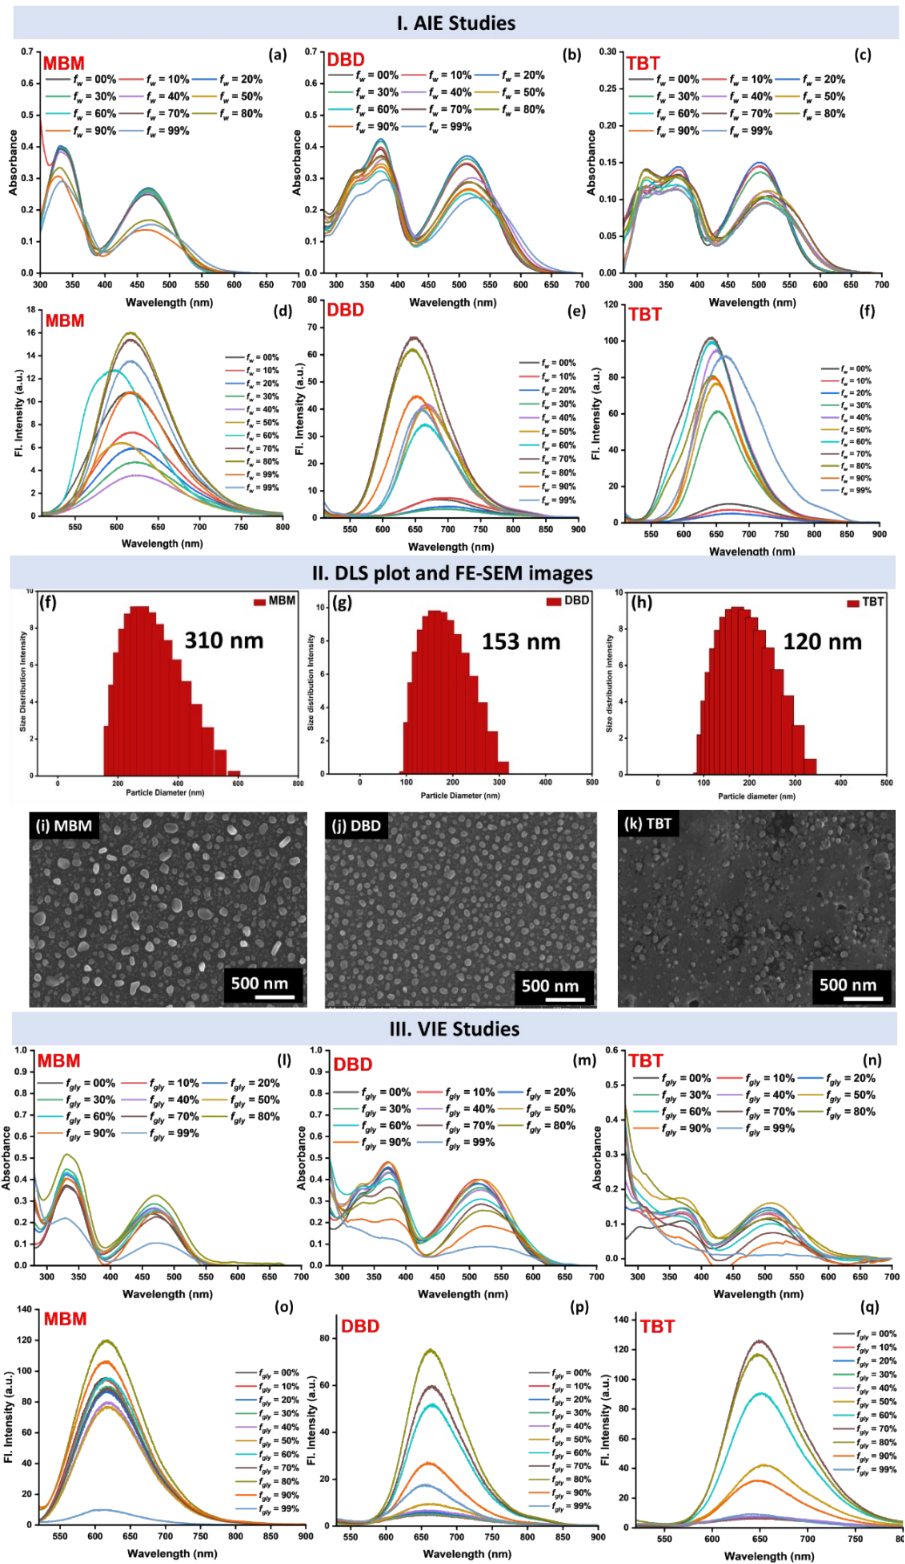

**Fig S3.** (I) UV-Vis (a-c) and Fl. spectrum (d-f) with different ( $f_w$ ), (II) DLS plot (f-h) and FE-SEM images (i-k) of **MBM** ( $f_w = 80\%$ ), **DBD** ( $f_w = 70\%$ ), and **TBT** ( $f_w = 70\%$ ), (III) UV-Vis (l-n) and Fl. spectrum (o-q) with different fractions of glycerol of **MBM**, **DBD** and **TBT**.

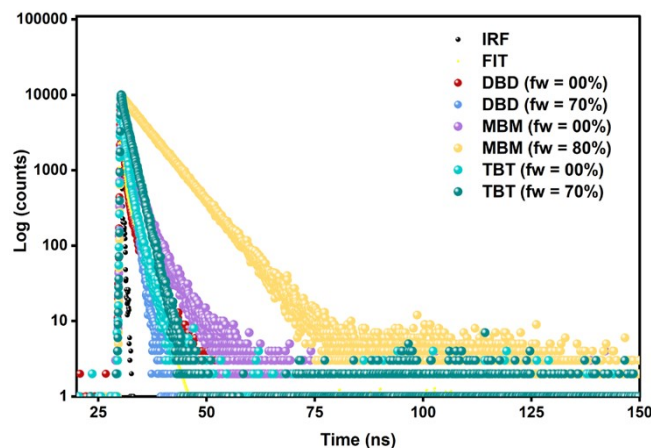

Fig S4 lifetime decay plot for MBM, DBD and TBT in AIE state

Table S2 Lifetime parameters for MBM, DBD and TBT in AIE state

| Sample               | $\tau_1$ | $\tau_2$ | $\alpha_1$ | $\alpha_2$ | Avg. $\langle\tau\rangle$<br>ns | $\chi^2$ |
|----------------------|----------|----------|------------|------------|---------------------------------|----------|
| MBM ( $f_w = 00\%$ ) | 0.63     | 2.84     | 0.80       | 0.20       | <b>1.80</b>                     | 1.1      |
| MBM( $f_w = 80\%$ )  | 0.15     | 6.17     | 0.44       | 0.56       | <b>6.06</b>                     | 1.0      |
| DBD ( $f_w = 00\%$ ) | 0.23     | 2.31     | 0.96       | 0.04       | <b>0.76</b>                     | 1.0      |
| DBD ( $f_w = 70\%$ ) | 0.24     | 0.98     | 0.48       | 0.52       | <b>0.84</b>                     | 1.0      |
| TBT ( $f_w = 00\%$ ) | 1.69     | 0.41     | 0.85       | 0.15       | <b>0.94</b>                     | 1.0      |
| TBT( $f_w = 70\%$ )  | 0.21     | 1.73     | 0.45       | 0.55       | <b>1.60</b>                     | 1.0      |

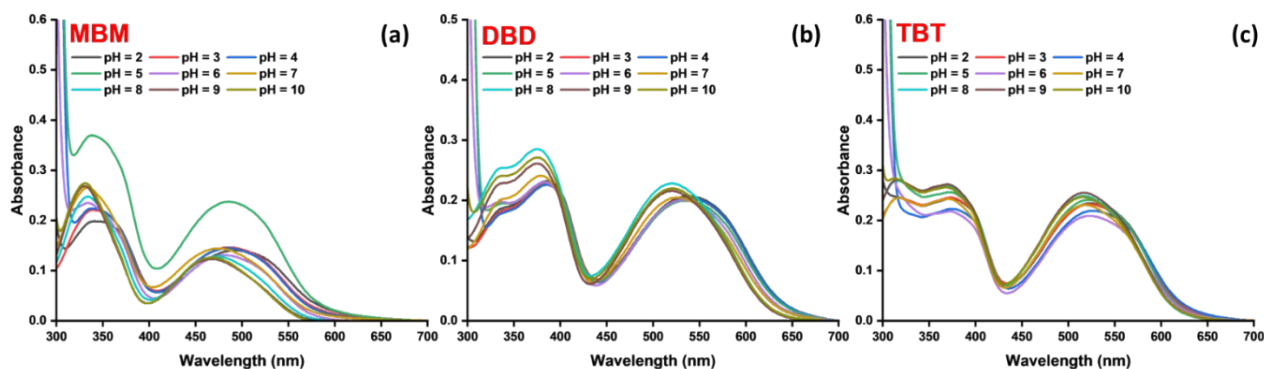

Fig S5. pH-dependent UV-Vis spectrum of (a) MBM, (b) DBD, and (c) TBT

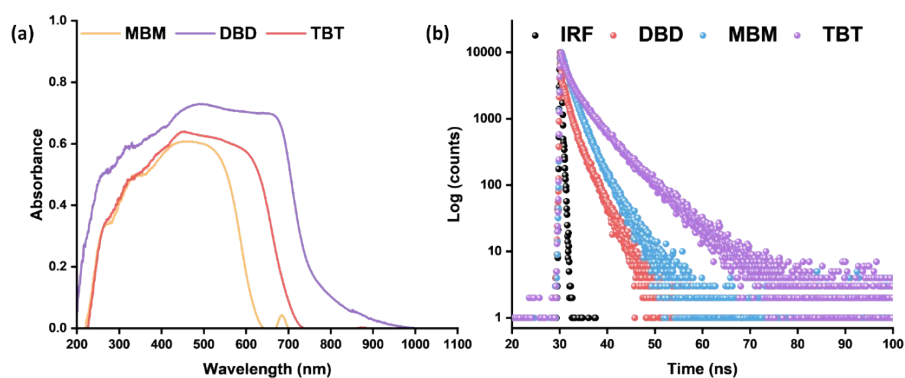

**Fig S6.** Solid state (a) UV-Vis spectrum (b) lifetime decay curve of **MBM**, **DBD** and **TBT**.

**Table S3.** Lifetime parameters for **MBM**, **DBD** and **TBT** in solid state

| Sample     | $\lambda_{\text{emi}}$<br>(nm) | $\Phi_f$<br>(%) | $\tau_1$ | $\tau_2$ | $a_1$ | $a_2$ | Avg.<br>$\langle\tau\rangle$ (ns) | $\chi^2$ | $k_r \times 10^6$<br>$s^{-1}$ | $k_{nr} \times 10^6$<br>$s^{-1}$ |
|------------|--------------------------------|-----------------|----------|----------|-------|-------|-----------------------------------|----------|-------------------------------|----------------------------------|
| <b>MBM</b> | 630                            | 12              | 0.92     | 2.83     | 0.66  | 0.34  | 2.09                              | 1.0      | 57.4                          | 421.05                           |
| <b>DBD</b> | 680                            | 3               | 0.04     | 2.24     | 0.98  | 0.02  | 1.15                              | 1.1      | 26.0                          | 843.5                            |
| <b>TBT</b> | 730                            | 8               | 1.32     | 5.62     | 0.71  | 0.29  | 4.03                              | 1.0      | 19.8                          | 228.3                            |

## I. Cytotoxicity studies

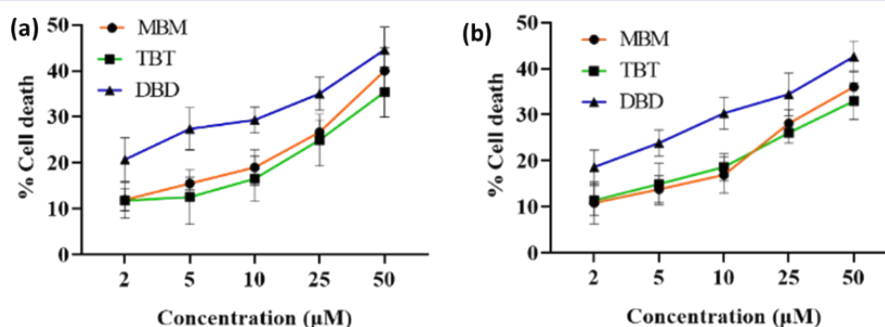

## II. Colocalization studies

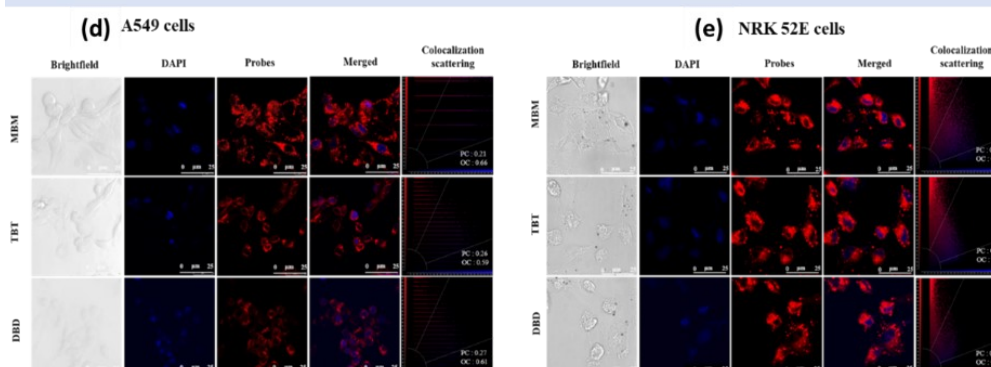

**Fig S7.**(I) Cytotoxicity study of the designed probes in (a) A549 cells, and (b) NRK cells, the MTT assays were carried out in A549 cells and NRK cells using the probes with different concentration 2, 5, 10, 25, 50  $\mu\text{M}$  for 24 h. (II) Colocalization studies of **MBM**, **DBD** and **TBT**

with nucleus staining dye 4',6-diamidino-2-phenylindole (DAPI) for (d) A549 and (e) NRK 52E cells (fixed).

**Table S4.** Respective Pearson's correlation coefficient for **MBM**, **DBD** and **TBT** for lysosome and LD in the fixed cells

| Probes     | Pearson correlation for Lysosome | Pearson correlation for LDs |
|------------|----------------------------------|-----------------------------|
| <b>MBM</b> | 0.94                             | 0.92                        |
| <b>DBD</b> | 0.91                             | 0.89                        |
| <b>TBT</b> | 0.89                             | 0.92                        |

**Oleic acid study (a) MBM (b) DBD and (c) TBT**

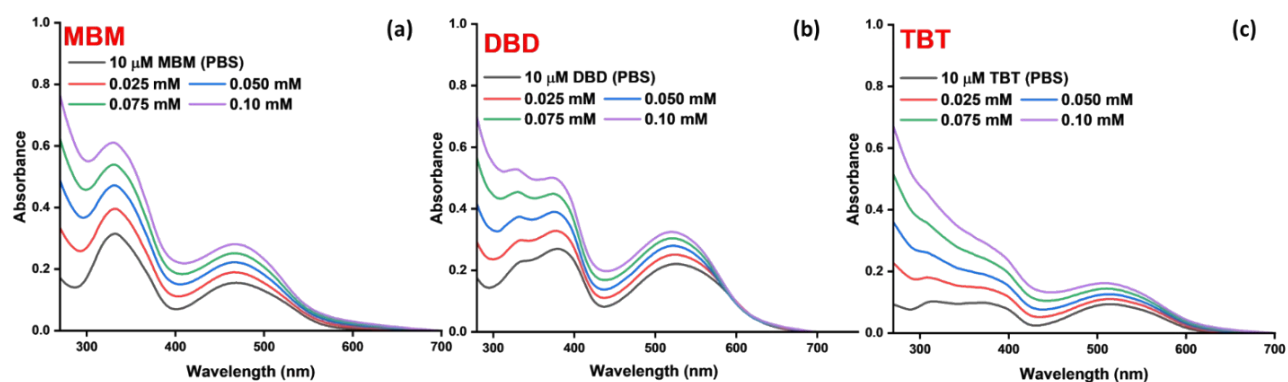

**Fig S8.** UV-Vis spectrum of (a) **MBM** (b) **DBD** and (c) **TBT** upon treatment of oleic acid

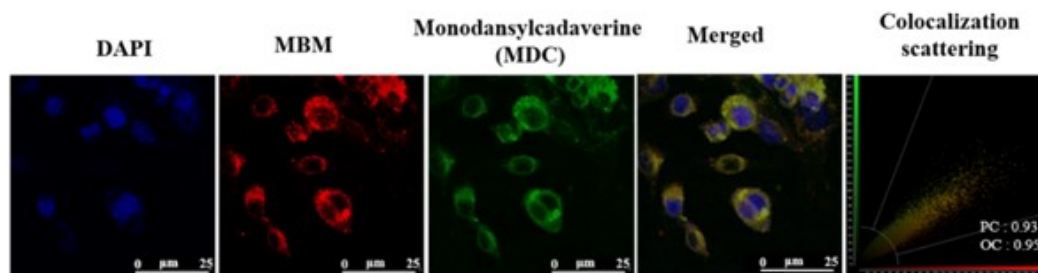

**Fig S9.** Cellular localisation of **MBM** in A549 cells. Merged image shows the co-localisation of **MBM** probe with MDC (a standard dye for APGs).

## Photostability of probes

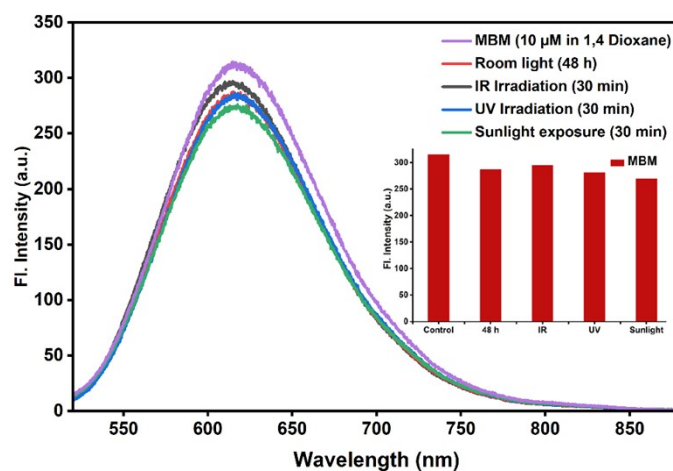

Fig S10. Fl. spectrum of MBM upon UV, IR, Sunlight irradiation and after 48h

## Synthesis and Characterisation

### HRMS, $^1\text{H}$ NMR, $^{13}\text{C}$ NMR and IR spectrum

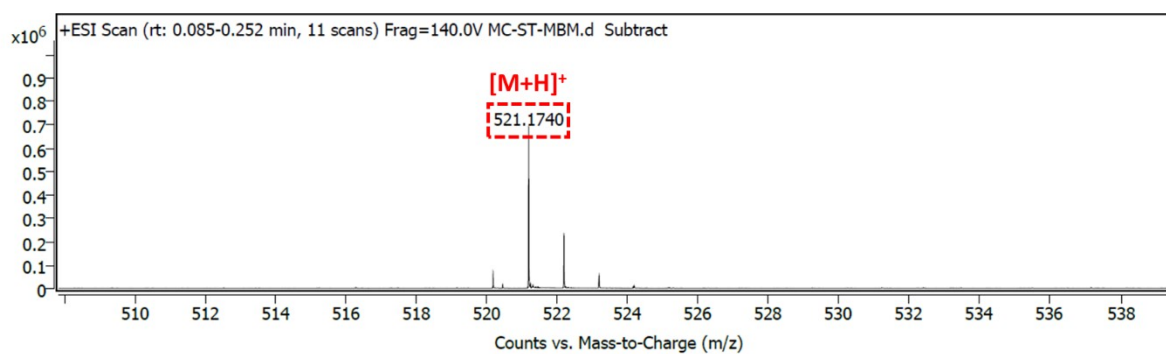

Fig S11. HRMS spectra for MBM

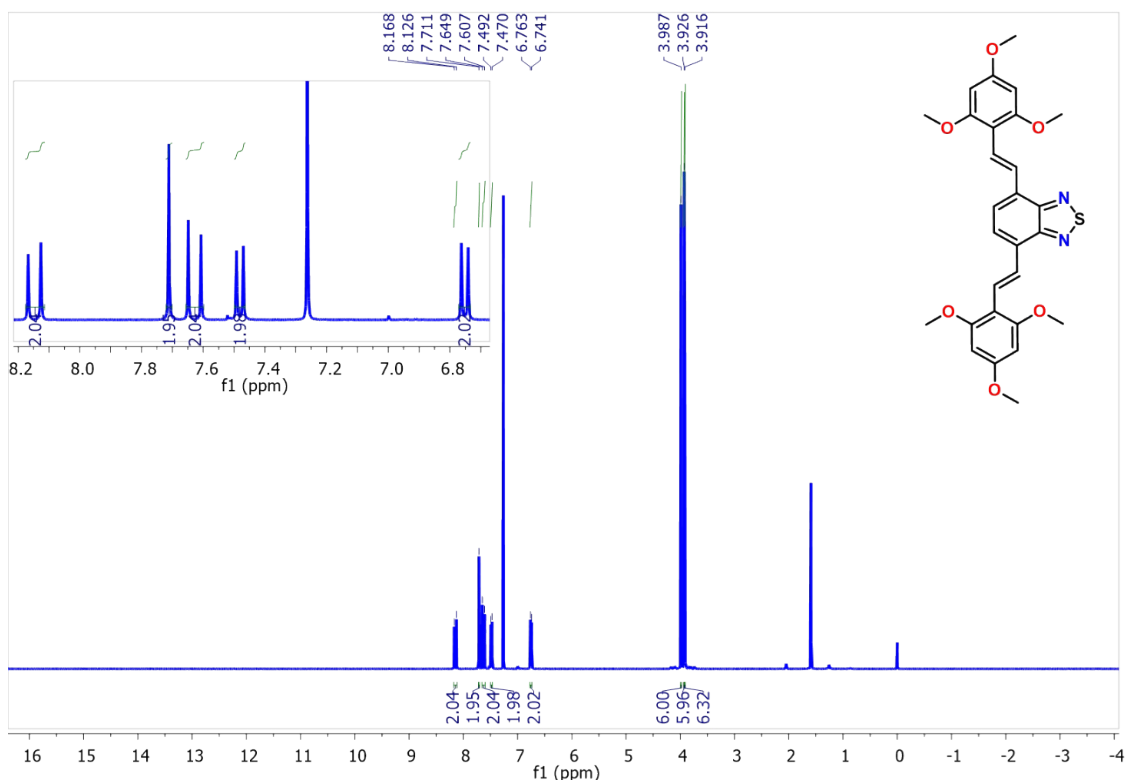

Fig S12  $^1\text{H}$  NMR spectra for MBM in  $\text{CDCl}_3$

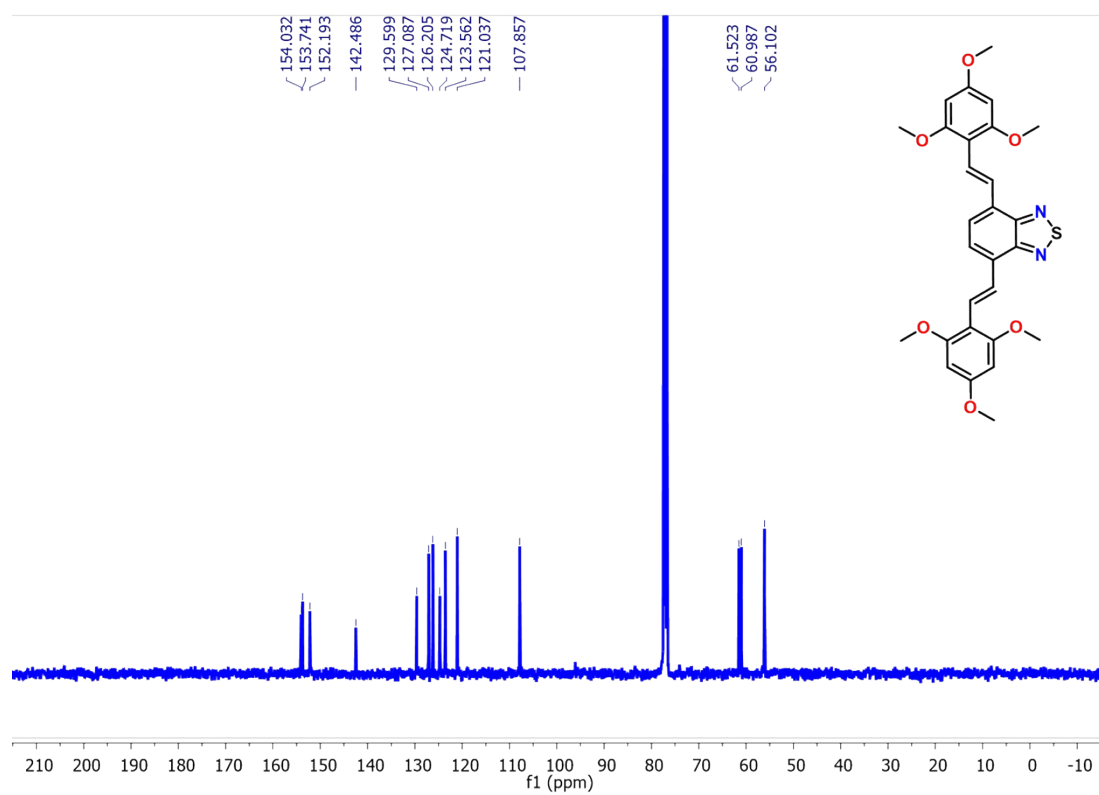

Fig S13.  $^{13}\text{C}$  NMR spectra for MBM in  $\text{CDCl}_3$

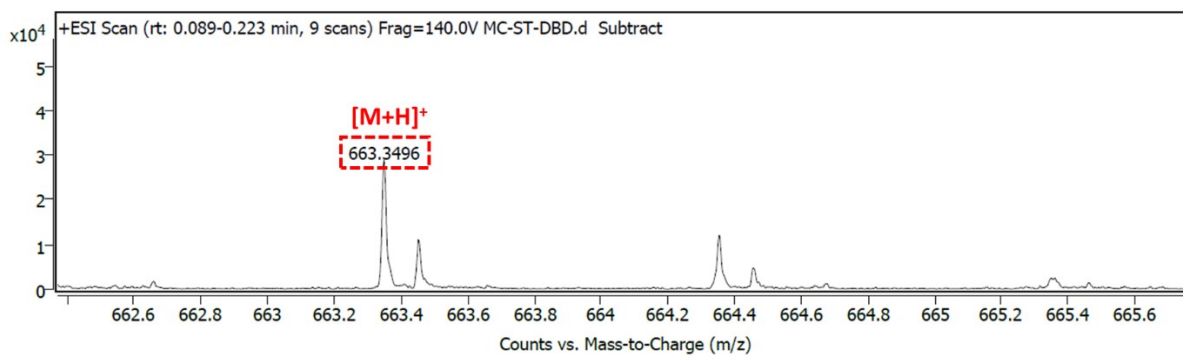

Fig S14. HRMS spectra for DBD

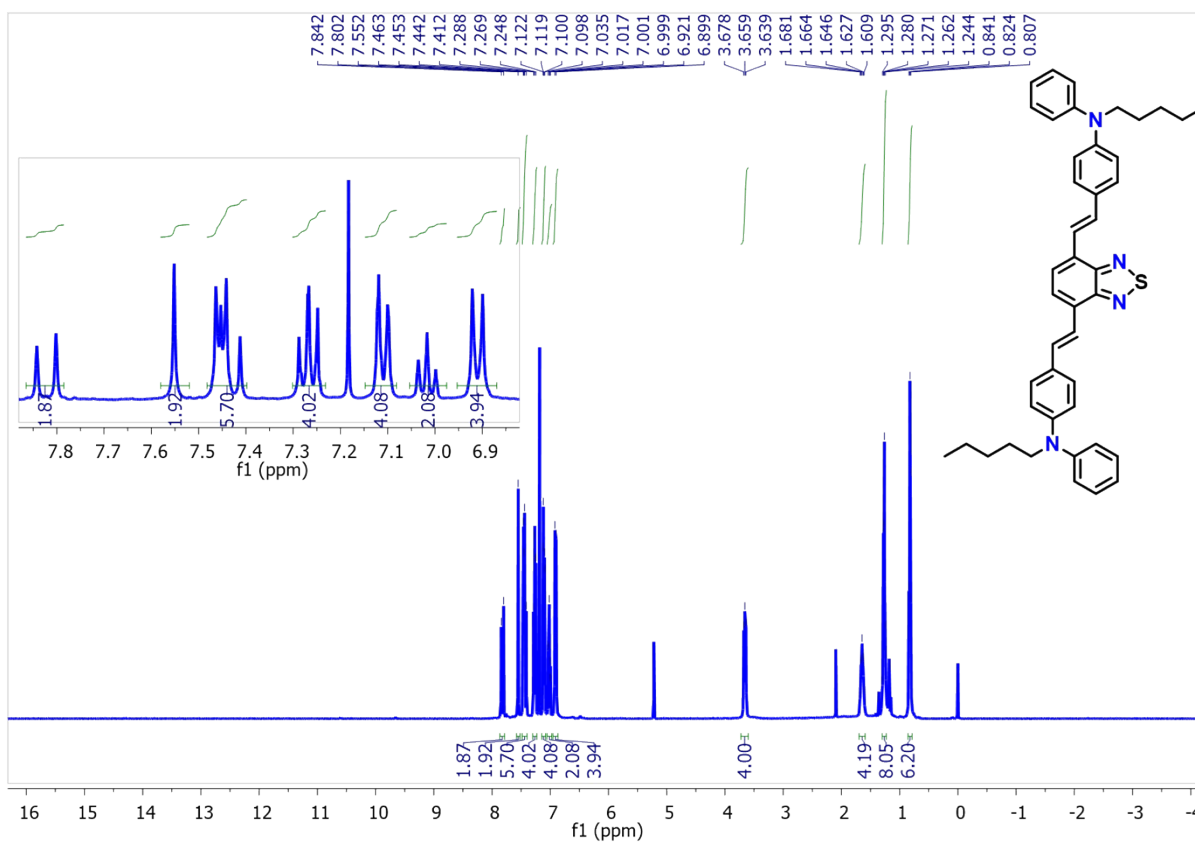

Fig S15.  $^1\text{H}$  NMR spectra for **DBD** in  $\text{CDCl}_3$

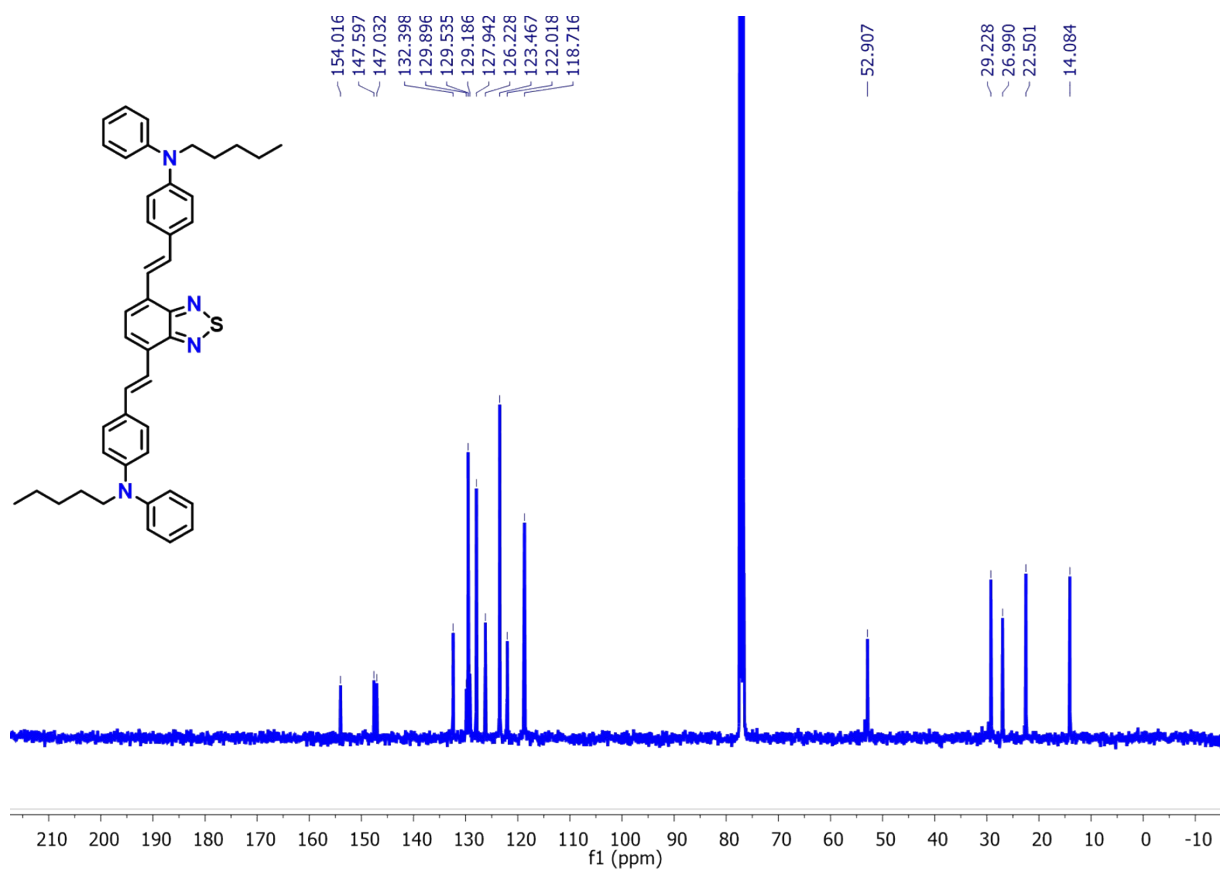

Fig S16.  $^{13}\text{C}$  NMR spectra for **DBD** in  $\text{CDCl}_3$

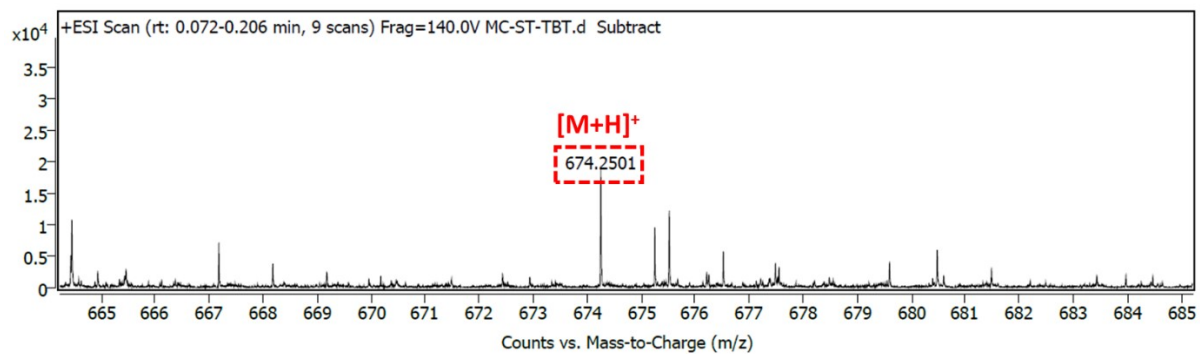

Fig S17. HRMS spectra for **TBT**

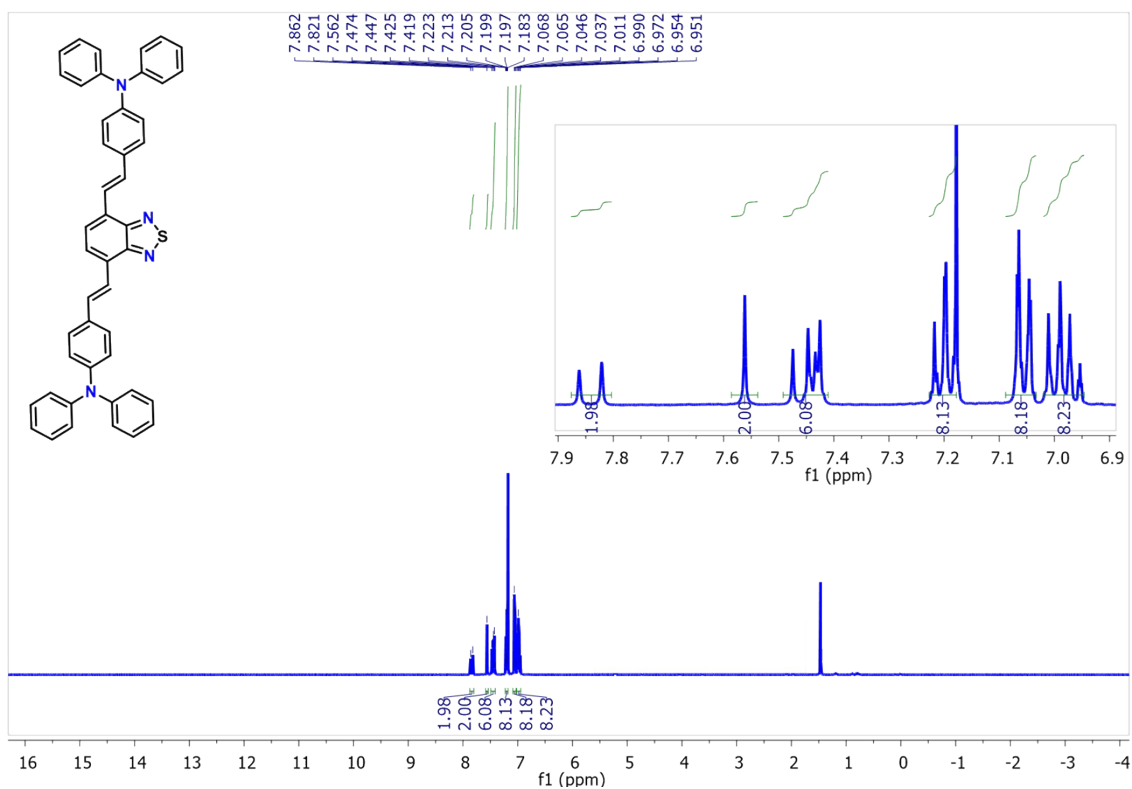

Fig S18. <sup>1</sup>H NMR spectra for TBT in CDCl<sub>3</sub>

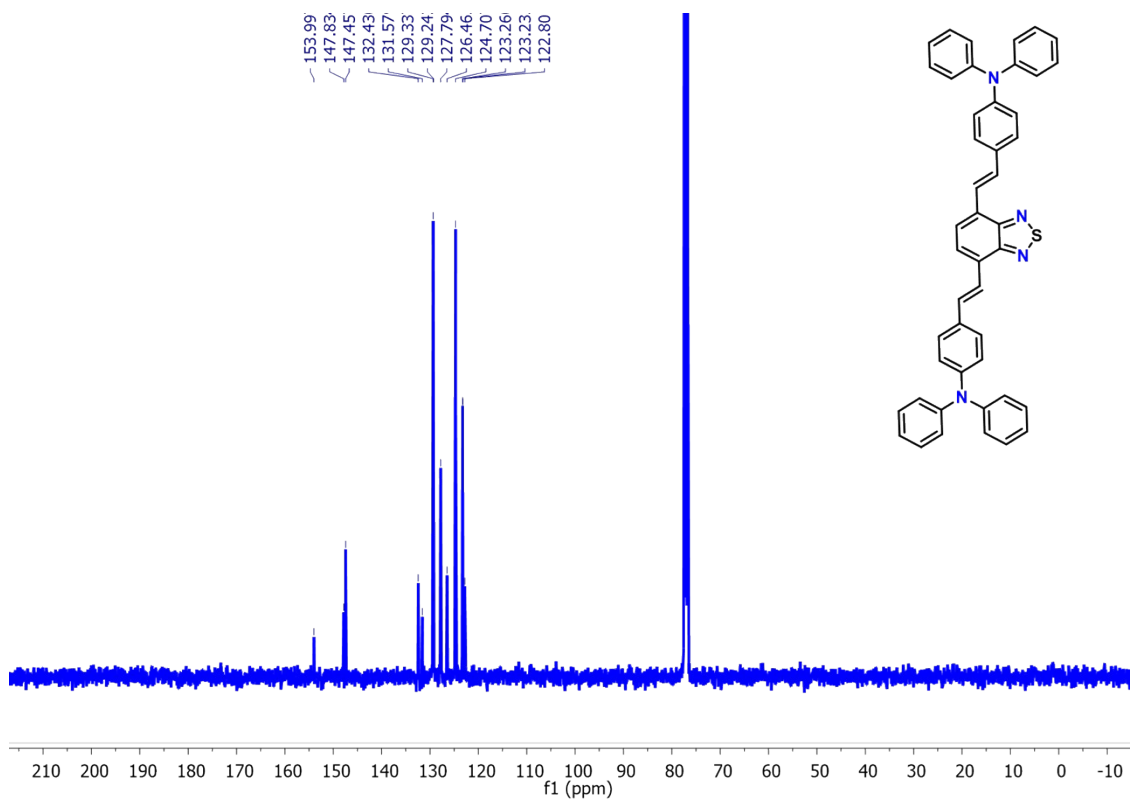

Fig S19. <sup>13</sup>C NMR spectra for TBT in CDCl<sub>3</sub>
